# Supplementary material for: Reciprocal regulation of the cholinic phenotype and epithelial-mesenchymal transition in glioblastoma cells
Source: PubMed Central journal article supplement (PMC5341988; doi:10.18632/oncotarget.12337), 2016-09-29
Supplement: oncotarget-07-73414-s001.pdf [file oncotarget-07-73414-s001.pdf]

## Reciprocal regulation of the cholinergic phenotype and epithelial-mesenchymal transition in glioblastoma cells

### Supplementary Materials

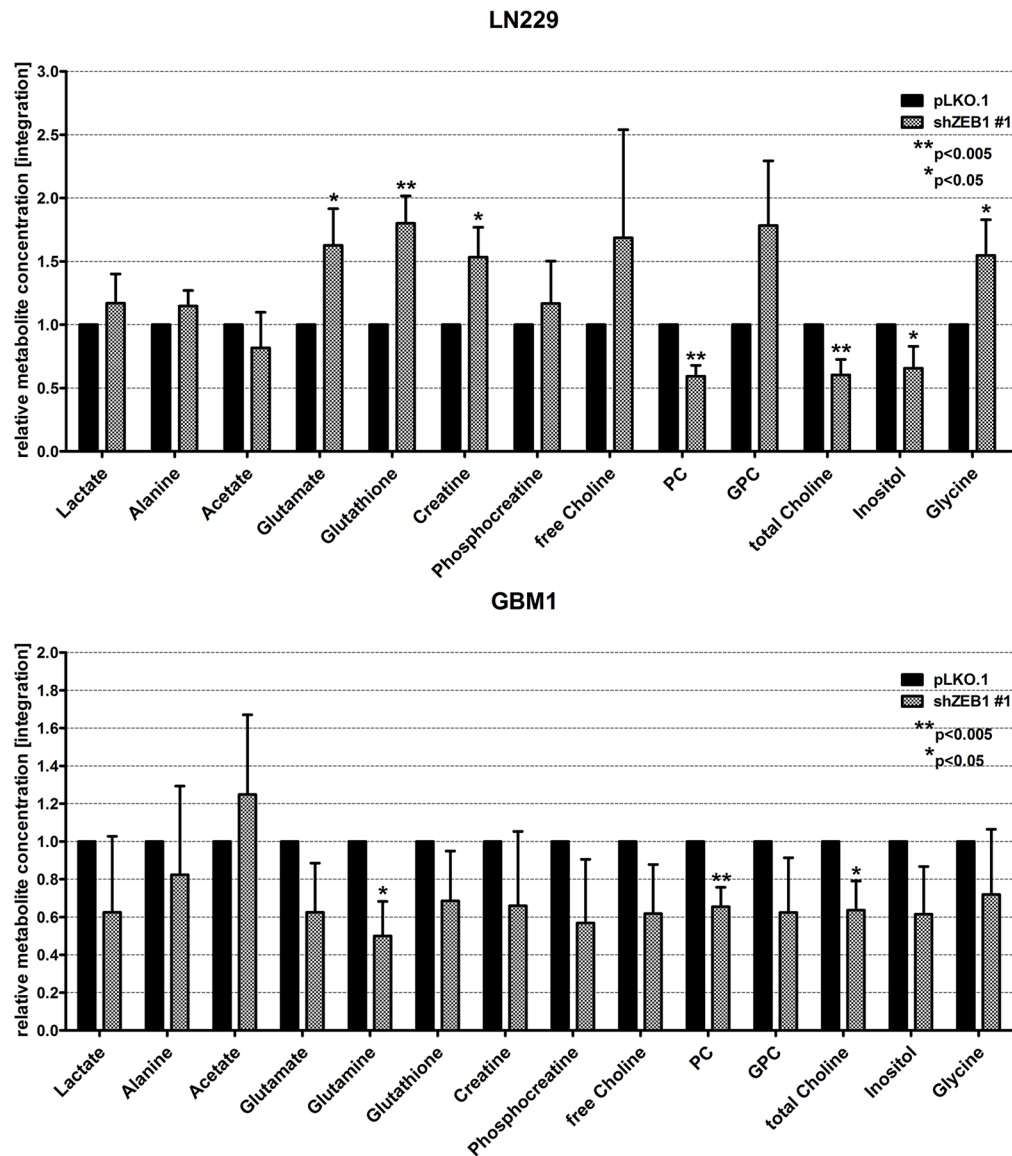

**Supplementary Figure S1: ZEB1 alters the metabolism of LN229 and GBM1 cells.** Water soluble metabolites of shZEB1#1 and pLKO.1 control cells were analyzed with  $^1\text{H-NMR}$  spectroscopy. The relative metabolite concentrations of three independent experiments are displayed as mean  $\pm$  SD.

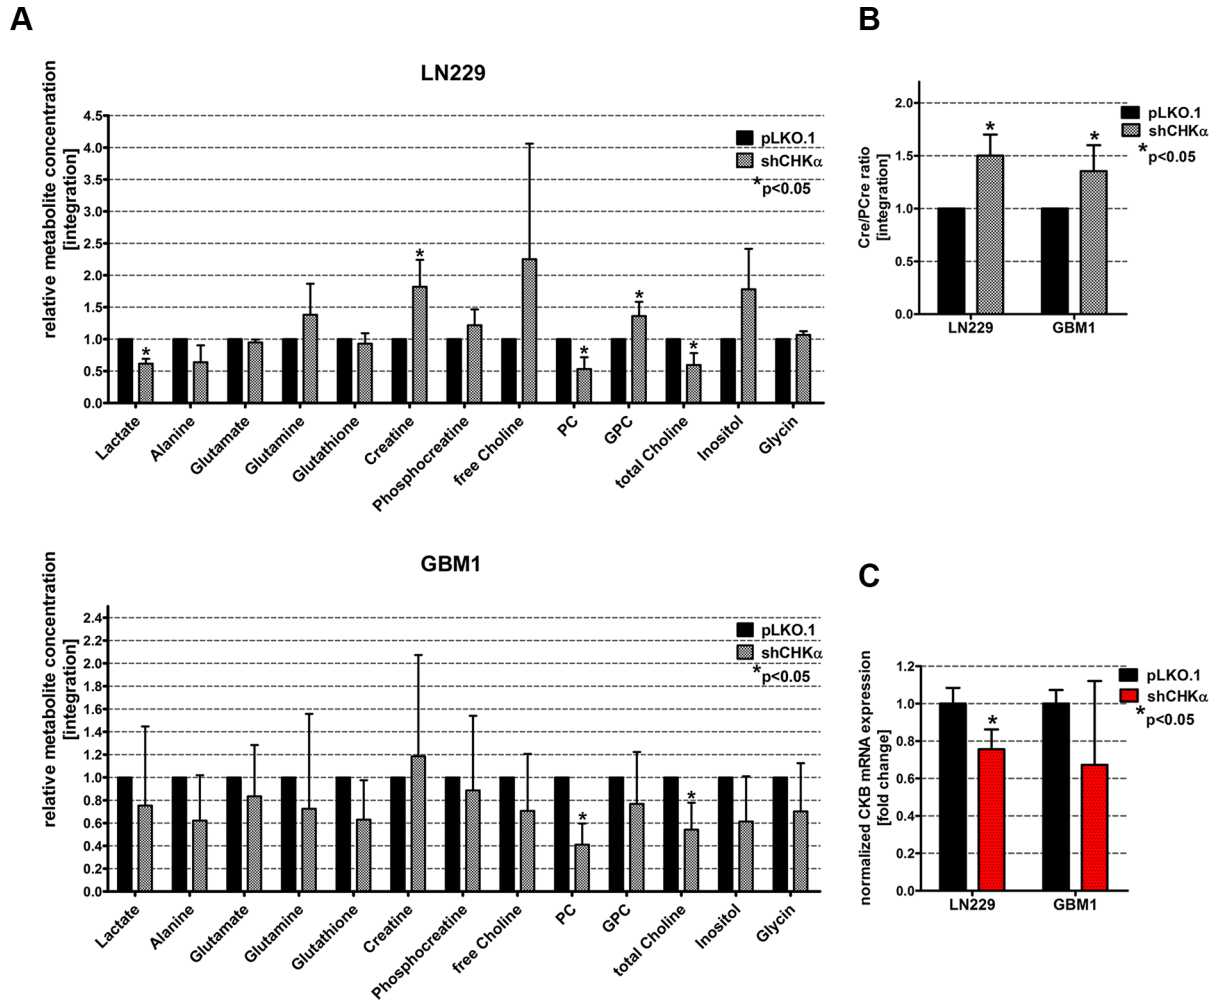

**Supplementary Figure S2: CHK $\alpha$  knockdown alters the metabolism of LN229 and GBM1 cells.** (A) Water soluble metabolites of shCHK $\alpha$  and pLKO.1 control cells were analyzed with <sup>1</sup>H-NMR spectroscopy. (B) The ratio of the relative creatine and phosphocreatine concentrations were calculated from <sup>1</sup>H-NMR spectra of shCHK $\alpha$  and pLKO.1 control cells. (C) CHK $\alpha$  knockdown decreases the expression of creatine kinase brain-type (CKB), the enzyme phosphorylating creatine. The data is represented as mean  $\pm$  SD ( $n = 3$ ).

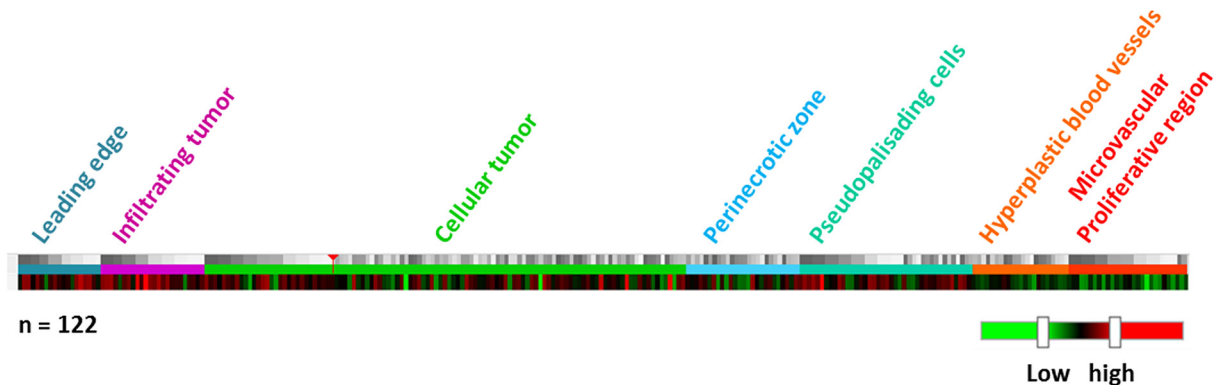

**Supplementary Figure S3: CHK $\alpha$  is expressed in higher levels in the infiltrating zone and the leading edge of GBM.** RNA sequencing data generated from anatomic structures isolated by laser microdissection. A total of 122 RNA samples were generated from 10 tumors and used for sequencing. Data from the IVY Glioblastoma project (Website: © 2015 Allen Institute for Brain Science. Ivy Glioblastoma Atlas Project [Internet]. Available from: glioblastoma.alleninstitute.org). Image credit: Allen Institute.

**Supplementary Table S1: Primer sequences used in RT qPCR**

| Name                     | Gene name     | Gene ID (NCBI) | Forward primer                | Reverse primer                |
|--------------------------|---------------|----------------|-------------------------------|-------------------------------|
| <b>β actin</b>           | <i>ACTB</i>   | 60             | CCCAGCACAATGAAGATCAA          | CGATCCACACGGAGTACTTG          |
| <b>β-2-microglobulin</b> | <i>B2M</i>    | 567            | GTTGCTCCACAGGTAGCT<br>CTAG    | ACAAGCTTTGAGTGCAAGA<br>GATTG  |
| <b>CHKα</b>              | <i>CHKA</i>   | 1119           | GAAAGTGCTCCTGCGGCT<br>GTATG   | CGGCTCGGGATGAACTGCTC          |
| <b>CKB</b>               | <i>CKB</i>    | 1152           | GGCAACATGAAGGAGGTGTT          | ATGGGCAGGTGAGGATGTAG          |
| <b>Nestin</b>            | <i>NES</i>    | 10763          | GGCGCACCTCAAGATGTCC           | CTTGGGGTCTGAAAGCTG            |
| <b>N-cadherin</b>        | <i>CDH2</i>   | 1000           | TATGCCCAAGACAAAGAGACC         | CAACTTCTGCTGACTCCTTCA         |
| <b>SOX2</b>              | <i>SOX2</i>   | 6657           | TGGACAGTTACGCGCACA            | CGAGTAGGACATGCTGTA            |
| <b>SNAI1</b>             | <i>SNAI1</i>  | 6615           | GCTGCAGGACTCTAATCC            | ATCTCCGGAGGTGGGATC            |
| <b>SNAI2</b>             | <i>SNAI2</i>  | 6591           | TGGTTGCTTCAAGGACACAT          | GTTGCAGTGAGGGCAAGAA           |
| <b>TWIST1</b>            | <i>TWIST1</i> | 7291           | TCCGCGTCCCCTAGCA              | TTCTCTGAAACAATGAC<br>ATCTAGGT |
| <b>VIMENTIN</b>          | <i>VIM</i>    | 7431           | CCCTCACCTGTGAAGTGGAT          | TCCAGCAGCTTCCTGTAGGT          |
| <b>ZEB1</b>              | <i>ZEB1</i>   | 6935           | AAGAATTCACAGTGGAG<br>AGAAGCCA | CGTTTCTTGCAGTTTGGGCATT        |
| <b>ZEB2</b>              | <i>ZEB2</i>   | 9839           | GCCGCGGCATATGGTGACA           | GCCACACTCTGTGCATTTGAA         |
